# Supplementary material for: An ultra-sensitive covalent organic framework based smoldering sensor for early warning of a granary fire
Source: Royal Society of Chemistry journal article supplement (doi:10.1039/d4ta06517d), 2024-11-20
Supplement: d4ta06517d1.pdf [file d4ta06517d1.pdf]

## Supplemental file

### **Ultra-Sensitive Covalent Organic Frameworks based Smoldering Sensor for Early Warning of Granary Fire**

**Yunlu Luan<sup>1</sup>, Jing Zhan<sup>1\*</sup>, Xiaojuan Ye<sup>1</sup>, Xiaowei Mu<sup>2, 3\*</sup>**

1 School of Civil Engineering, Anhui Jianzhu University, Hefei 230601, China

2 State Key Laboratory of Fire Science, University of Science and Technology of China, Hefei, 230026, China

3 Department of Chemical Engineering, University of Massachusetts Amherst, Amherst, MA 01003-9303, United States

\* Corresponding authors: zhanjing@ahjzu.edu.cn (Jing Zhan)

\* Corresponding authors: xwmu@ustc.edu.cn (Xiaowei Mu)

## Captions

### Section S1. Instruments

**Table S1.** XPS elemental content of COFs and COFs/furfural/aniline hydrochloride.

**Table S2** Furfural coloration time

**Table S3** RSS and filter paper of coloration time

**Table S4** The RGB value and the corresponding thermocouple temperature data of the rice smoldering sensor under different heating time.

**Figure S1** XRD patterns of COFs

**Figure S2** XPS survey spectra of COFs/furfural/aniline hydrochloride.

**Figure S3** Color absorbance curves of furfural with different concentrations.

**Figure S4** The external physical map of rice before smoldering, uncarbonized (left); External physical map of rice after smoldering, carbonization (right).

## **Section S1. Instruments**

The instrument used in this FTIR experiment is a Nicolet iS50 Fourier transform infrared spectrometer from Seymour Fisher Technology Inc., USA.

Scanning electronic microscope (SEM) was operated on FEI Sirion 200 scanning electron microscope (JEOL Co., Ltd., Japan) with an operating voltage of 10 kV to observe the surface morphology of COFs, COFs coated filter paper and filter paper.

Nitrogen adsorption-desorption isotherms were measured on a Tristar II 3020 M automatic surface area and pore analyzer (Micromeritics Co., Ltd., USA) with a degassing temperature at 150°C. The Brunauer–Emmett–Teller (BET) method was utilized to calculate the specific surface areas of COFs.

X-ray photoelectron spectroscopy (XPS) was measured on ESCALAB QXin Electron Spectrometer from Seymour Fisher Technology Inc., USA

The GC/MS instrument model is Trace 1300 and ISQ QD produced by Seymour Fisher Technology Inc., USA. The sample transmission line temperature is set to 280 °C to avoid the condensation of pyrolysis gas and block the pipeline.

The data of the ultraviolet-visible spectrophotometer were measured on the 752 ultraviolet-visible spectrophotometer (Shanghai Jinghua Technology Instrument Co., Ltd., China.), and the experimental wavelength was 510 nm.

**Table S1** XPS elemental content of COFs and COFs/furfural/aniline hydrochloride.

| Sample                                 | C (at%) | O (at%) | N (at%) |
|----------------------------------------|---------|---------|---------|
| COFs                                   | 61.9    | 3.4     | 26.27   |
| COFs/furfural/aniline<br>hydrochloride | 70.83   | 2.9     | 34.7    |

**Table S2** Furfural coloration time

| Group number    | 1     | 2     | 3     | 4     | 5       | 6       | 7        |
|-----------------|-------|-------|-------|-------|---------|---------|----------|
| Furfural        |       |       |       |       |         |         |          |
| concentration   | 2     | 1     | 0.5   | 0.4   | 0.3     | 0.2     | 0.1      |
| (ug/ml)         |       |       |       |       |         |         |          |
| coloration time |       |       |       |       |         |         |          |
| (s)             | 13"56 | 15"54 | 20"54 | 53"08 | 1'27"45 | 1'41"57 | 19'35"42 |

**Table S3** RSS and filter paper of coloration time

| Group number                     | 1  | 2   | 3   | 4    | 5    | 6    | 7    | 88   |
|----------------------------------|----|-----|-----|------|------|------|------|------|
| Furfural concentration (ug/ml)   | 1  | 0.5 | 0.1 | 0.09 | 0.07 | 0.05 | 0.03 | 0.01 |
| RSS coloration time (s)          | 10 | 13  | 78  | 99   | 156  | 363  | 1252 | -    |
| Filter paper coloration time (s) | 30 | 136 | 389 | 427  | 1157 | -    | -    | -    |

**Table S4** The RGB value and the corresponding thermocouple temperature data of the rice smoldering sensor under different heating time.

| Heating time<br>(min) | R   | G   | B   | TC1 (°C<br>) | TC2<br>(°C) | TC3<br>(°C) | depth of<br>color |
|-----------------------|-----|-----|-----|--------------|-------------|-------------|-------------------|
| 0                     | 255 | 255 | 223 | 18           | 18          | 18          | light             |
| 40                    | 230 | 216 | 209 | 98           | 94.7        | 82.1        | light             |
| 50                    | 237 | 214 | 196 | 104.7        | 94.7        | 82.3        | light             |
| 60                    | 235 | 195 | 174 | 108.3        | 94.7        | 82.3        | light             |
| 70                    | 233 | 191 | 163 | 113.9        | 94.7        | 82.3        | light             |
| 80                    | 228 | 175 | 154 | 121.9        | 94.7        | 82.3        | deep              |
| 90                    | 216 | 160 | 154 | 130.1        | 94.7        | 82.3        | deep              |
| 100                   | 204 | 163 | 145 | 137.3        | 94.7        | 82.3        | deep              |
| 110                   | 212 | 140 | 140 | 143.1        | 94.7        | 82.3        | deep              |
| 120                   | 214 | 140 | 121 | 149.4        | 94.7        | 82.3        | deep              |

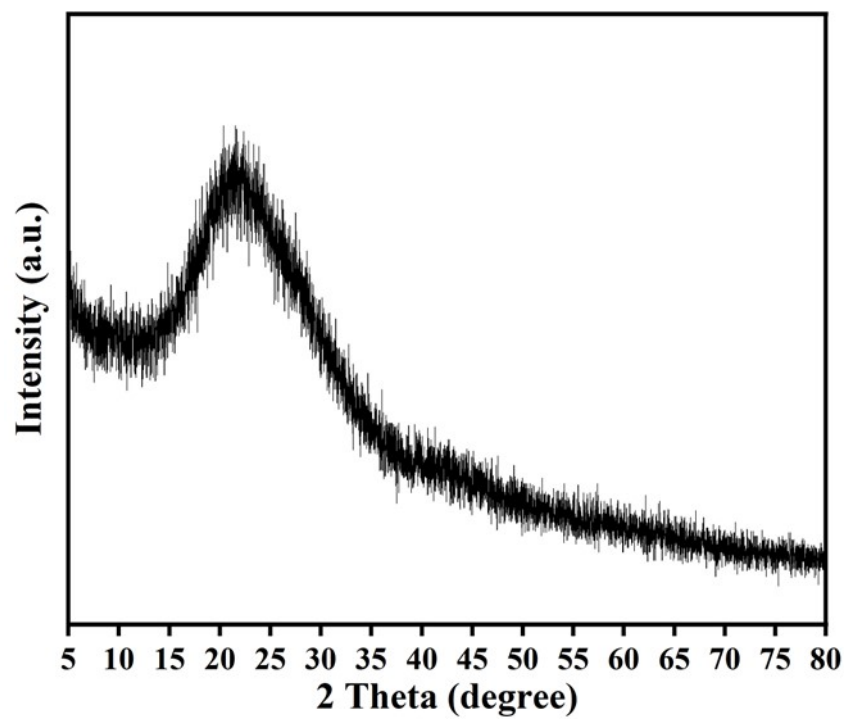

**Figure S1** XRD patterns of COFs.



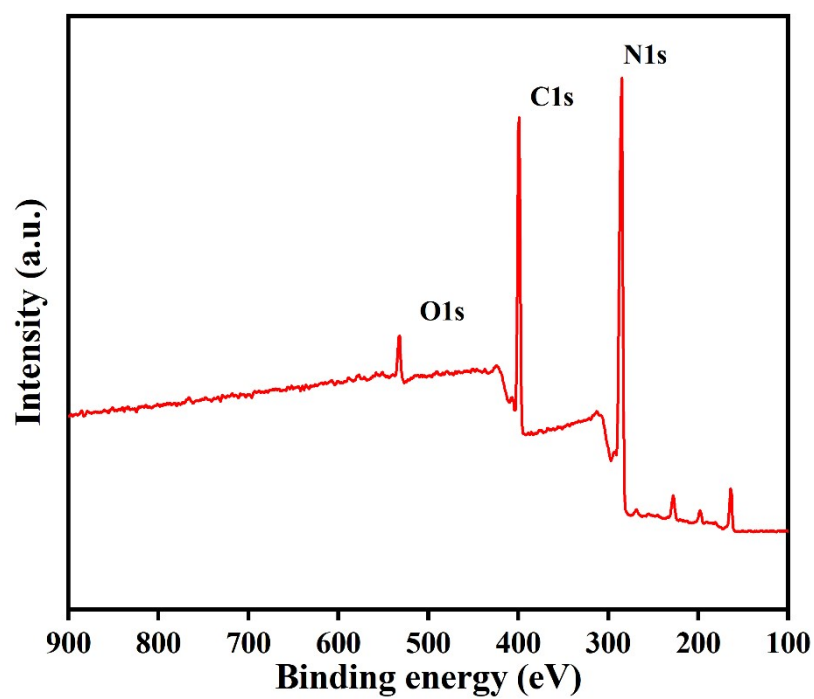

**Figure S2** XPS survey spectra of COFs/furfural/aniline hydrochloride.

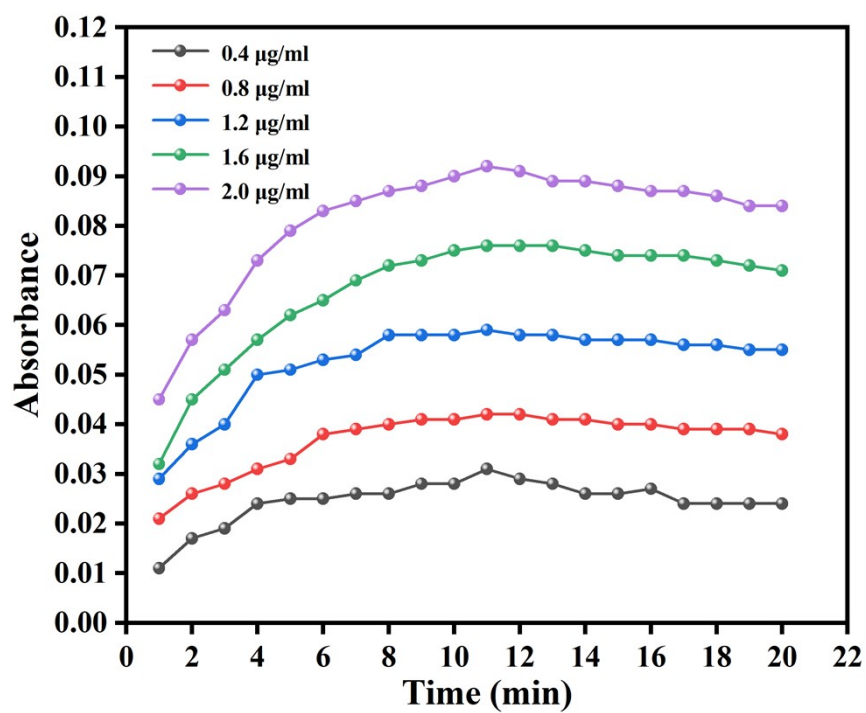

**Figure S3** Color absorbance curves of furfural with different concentrations.

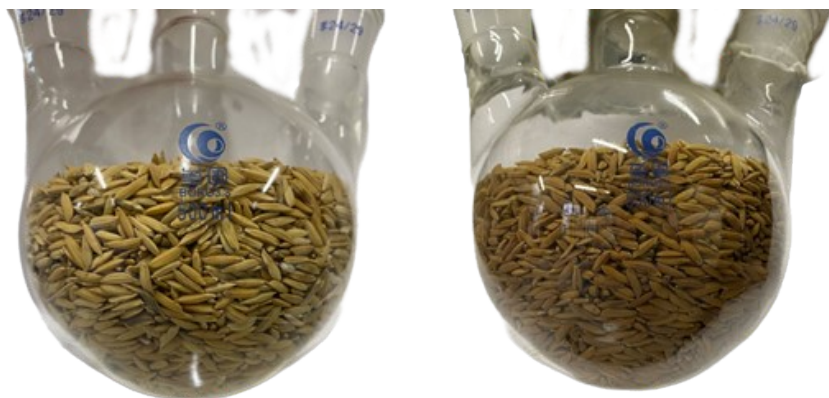

Figure S4 The external physical map of rice before smoldering, uncarbonized (left);  
External physical map of rice after smoldering, carbonization (right).
